# Supplementary material
Source: MDPI journal article supplement (https://www.mdpi.com/2076-3417/11/24/11620)
Supplement: s1 [file s1]

## Supplementary Materials

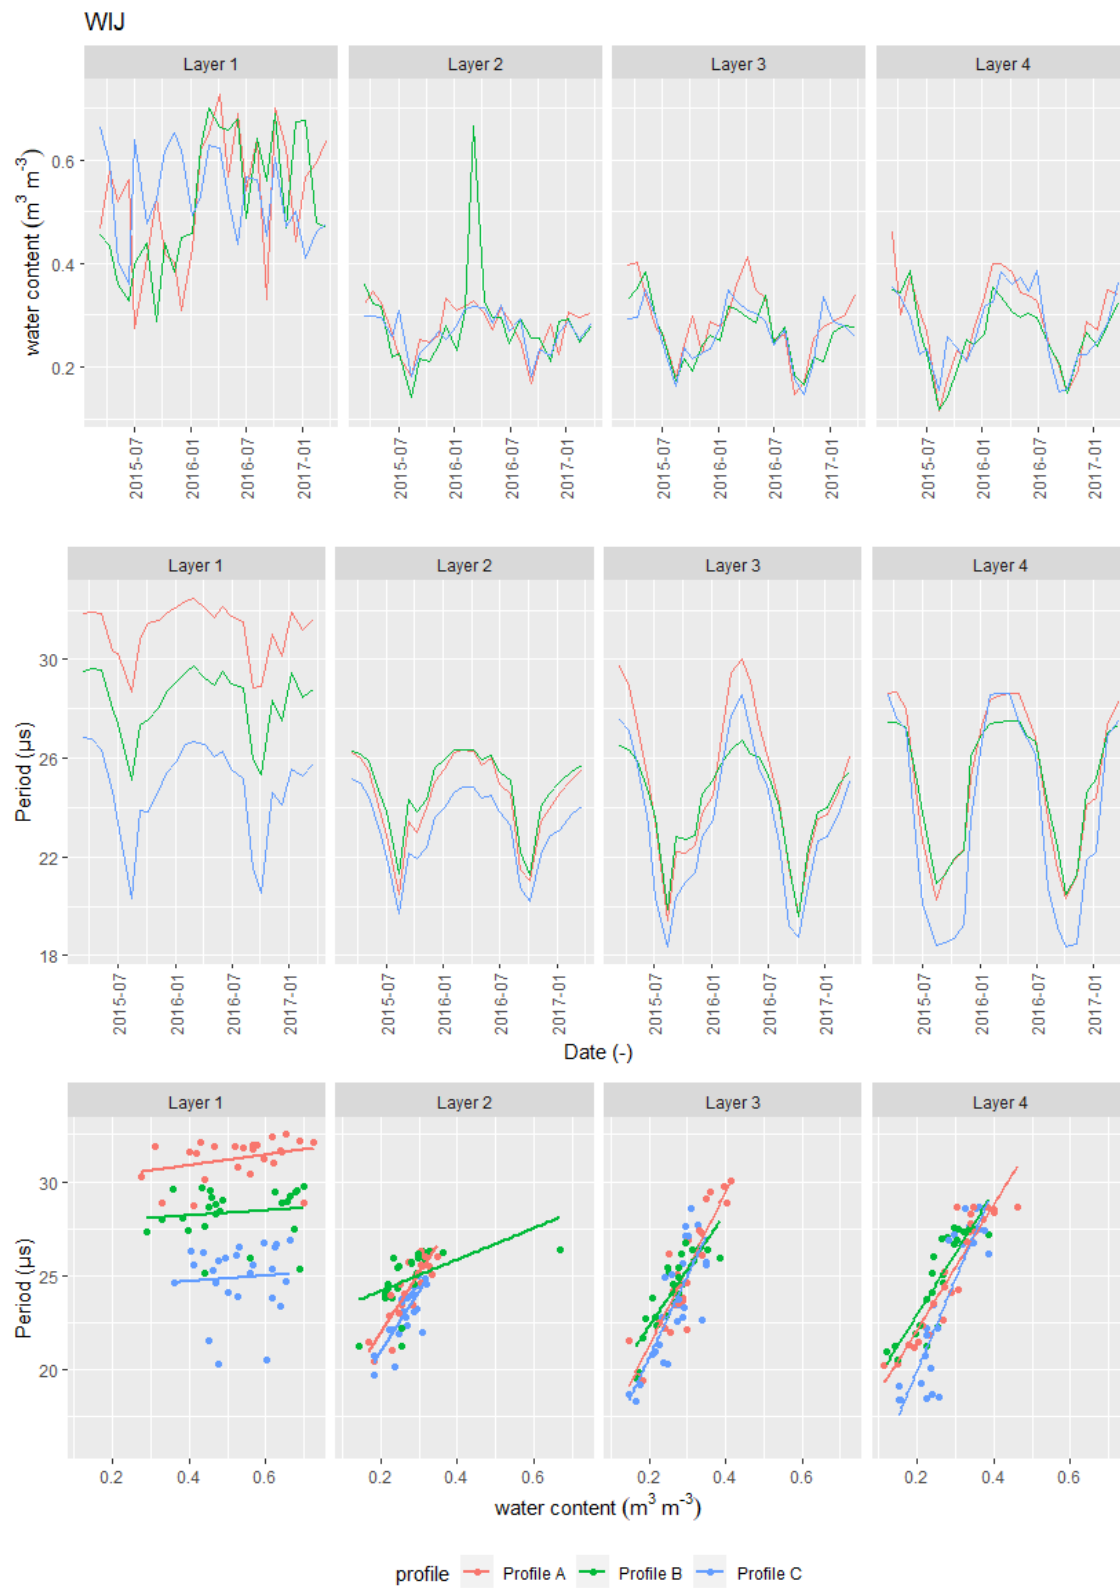

**Figure S1.** Layer specific relationships between reference gravimetric water content and FDR response (Period) for the WIJ site.

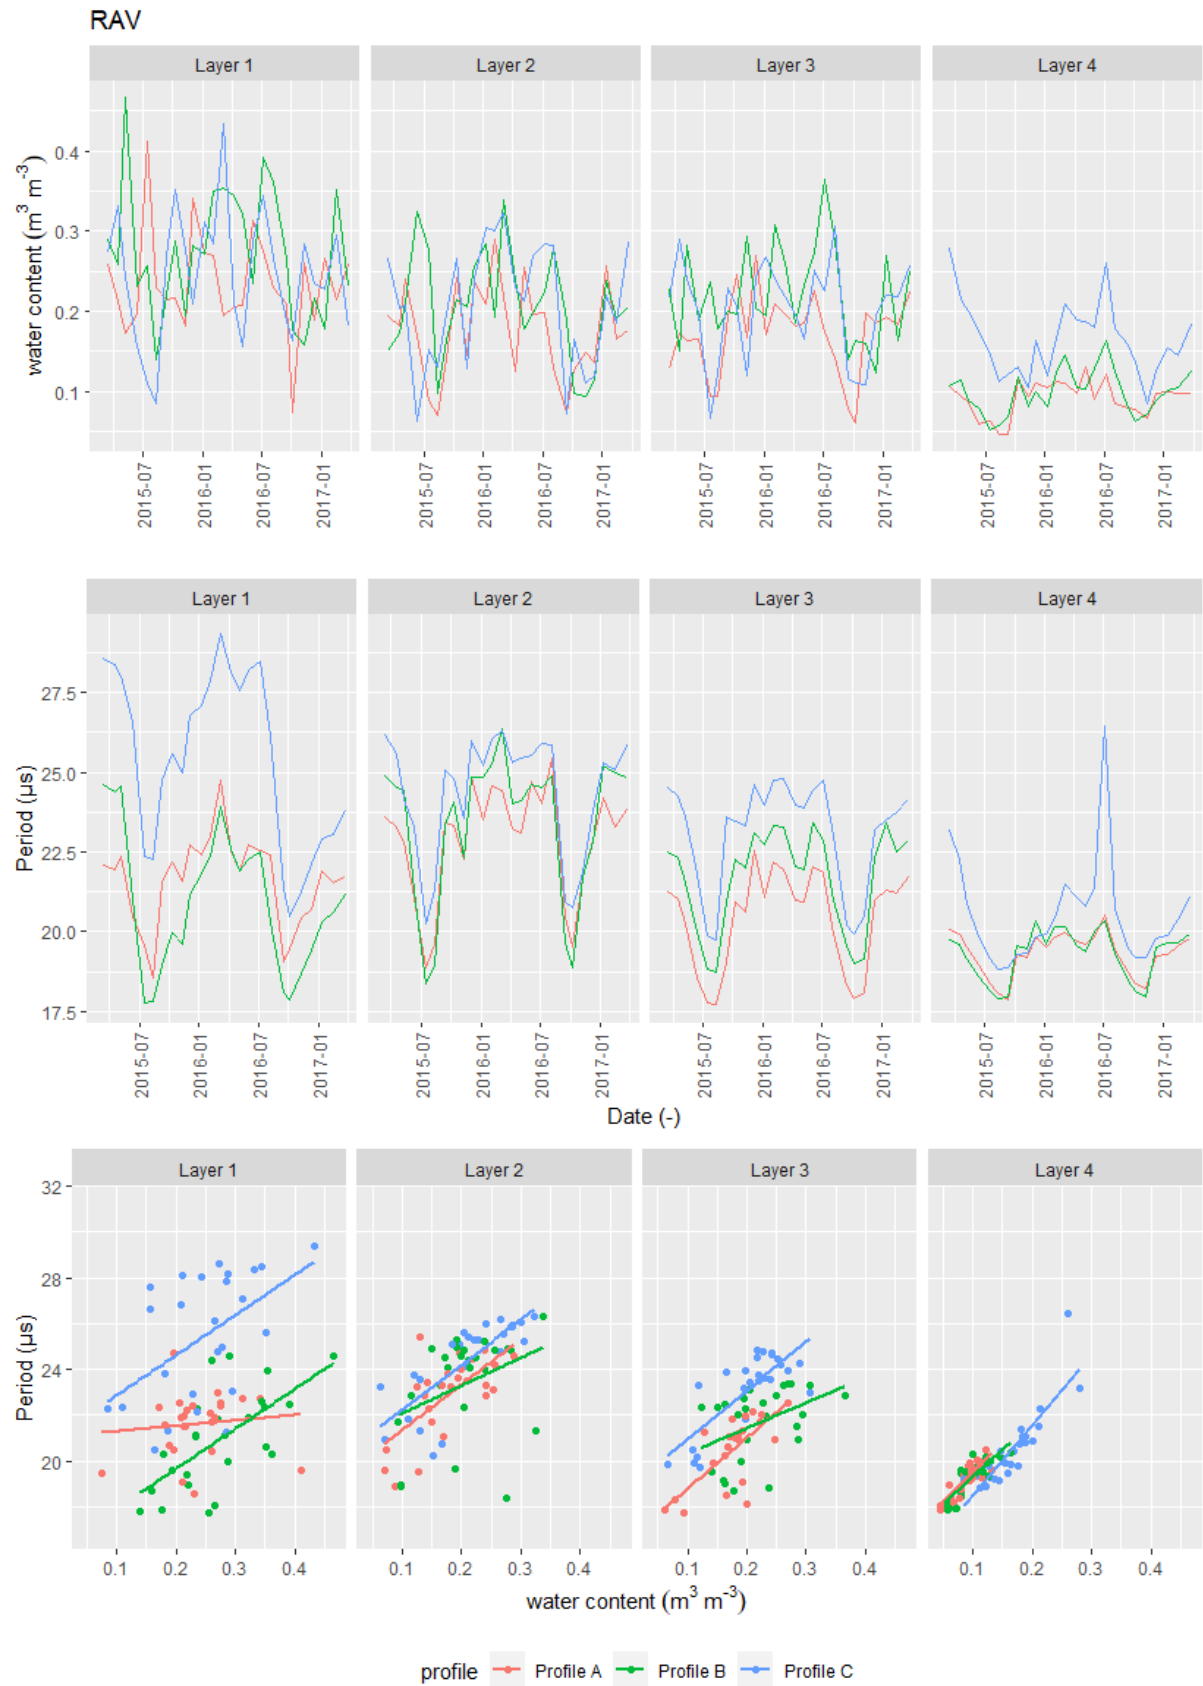

**Figure S2.** Layer specific relationships between reference gravimetric water content and FDR response (Period) for the RAV site.

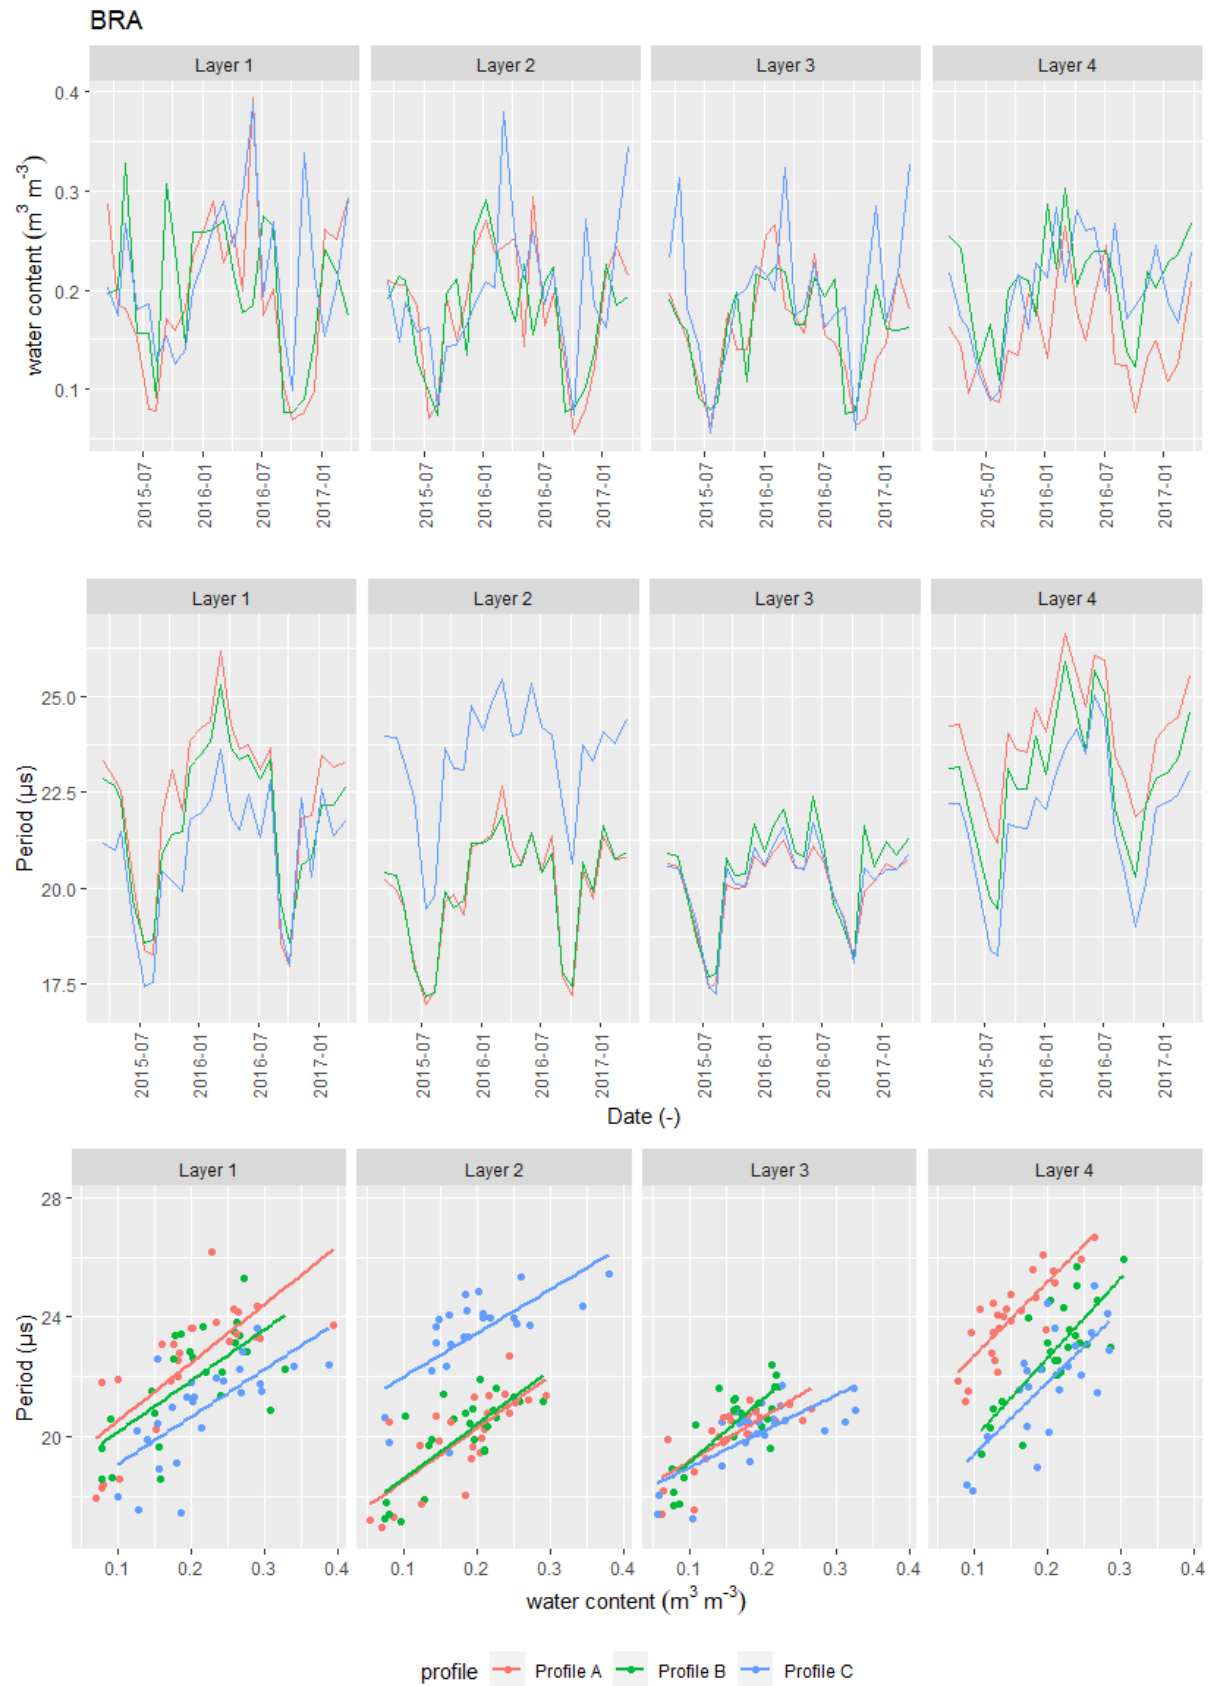

**Figure S3.** Layer specific relationships between reference gravimetric water content and FDR response (Period) for the BRA site.

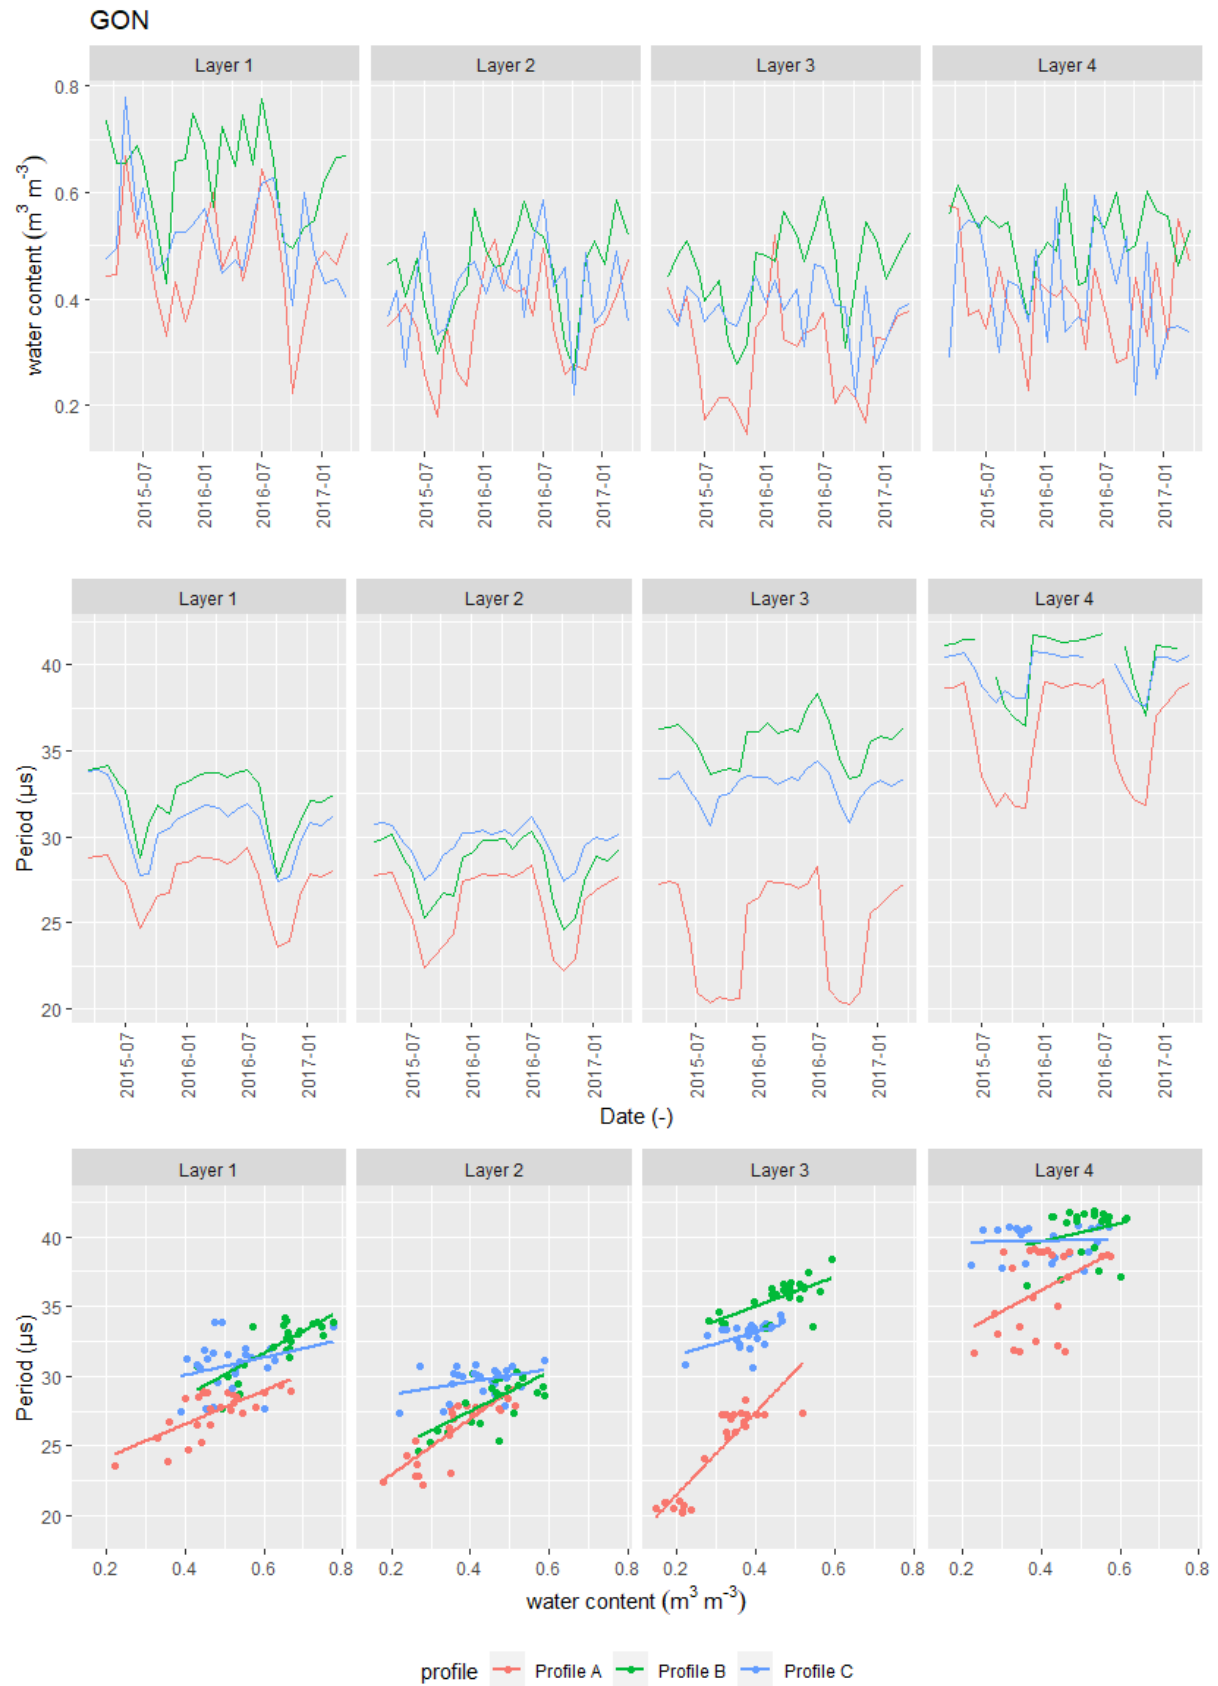

**Figure S4.** Layer specific relationships between reference gravimetric water content and FDR response (Period) for the GON site.

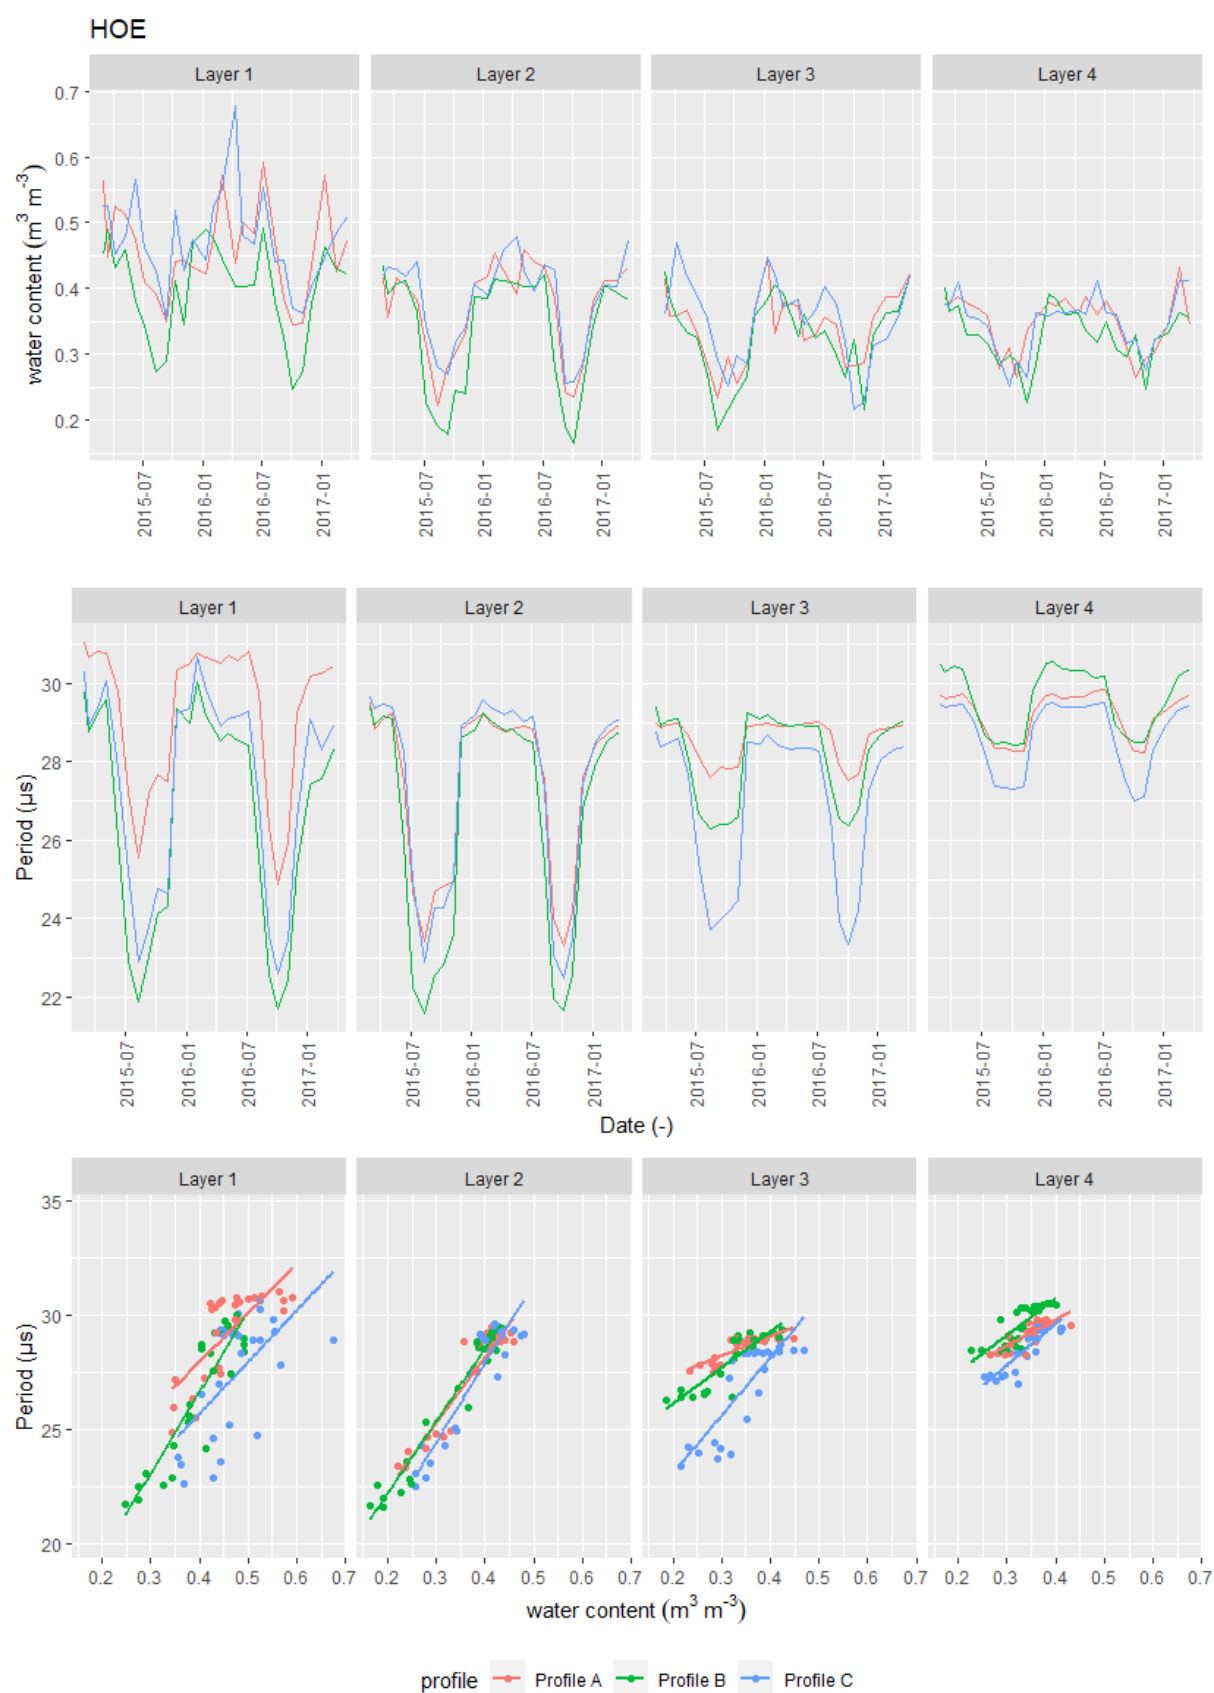

**Figure S5.** Layer specific relationships between reference gravimetric water content and FDR response (Period) for the HOE site.

**Table S1.** Coefficients and predictive quality of standard calibration functions for all profiles and depths of the WIJ site

| Profile | Layer | Model | Coefficients |         |        | Without temp correction       |         |        |        |                | With temp correction          |         |        |        |                |
|---------|-------|-------|--------------|---------|--------|-------------------------------|---------|--------|--------|----------------|-------------------------------|---------|--------|--------|----------------|
|         |       |       | C0           | C1      | C2     | R <sup>2</sup> <sub>adj</sub> | MPE     | SDPE   | RMSPE  | d <sub>r</sub> | R <sup>2</sup> <sub>adj</sub> | MPE     | SDPE   | RMSPE  | d <sub>r</sub> |
| A       | M01   | LM    | -0.4677      | 0.0283  | -      | 0.102                         | -0.1132 | 0.1192 | 0.163  | 0.337          | 0.049                         | -0.0589 | 0.1259 | 0.1367 | 0.469          |
|         |       | QM    | -0.0663      | -0.0063 | 0.0007 | 0.104                         | -0.1088 | 0.1187 | 0.1593 | 0.351          | 0.048                         | -0.0325 | 0.1332 | 0.1345 | 0.502          |
|         | M12   | LM    | -0.4677      | 0.0283  | -      | 0.778                         | -0.0542 | 0.023  | 0.0587 | 0.302          | 0.787                         | -0.0339 | 0.0267 | 0.0428 | 0.536          |
|         |       | QM    | -0.0663      | -0.0063 | 0.0007 | 0.779                         | -0.0783 | 0.0225 | 0.0814 | -0.009         | 0.783                         | -0.0571 | 0.0264 | 0.0627 | 0.264          |
|         | M24   | LM    | -0.4677      | 0.0283  | -      | 0.812                         | -0.0514 | 0.0393 | 0.0642 | 0.472          | 0.822                         | -0.0256 | 0.0529 | 0.0578 | 0.529          |
|         |       | QM    | -0.0663      | -0.0063 | 0.0007 | 0.807                         | -0.0712 | 0.0409 | 0.0817 | 0.309          | 0.809                         | -0.0414 | 0.0613 | 0.073  | 0.385          |
|         | M48   | LM    | -0.4677      | 0.0283  | -      | 0.859                         | -0.0461 | 0.0332 | 0.0564 | 0.648          | 0.856                         | -0.0186 | 0.0414 | 0.0447 | 0.748          |
|         |       | QM    | -0.0663      | -0.0063 | 0.0007 | 0.848                         | -0.0657 | 0.0347 | 0.074  | 0.516          | 0.841                         | -0.034  | 0.0471 | 0.0574 | 0.658          |
| B       | OFH   | LM    | -0.4677      | 0.0283  | -      | 0.017                         | -0.1816 | 0.1285 | 0.221  | 0.182          | 0.008                         | -0.1463 | 0.1346 | 0.197  | 0.303          |
|         |       | QM    | -0.0663      | -0.0063 | 0.0007 | 0.02                          | -0.1973 | 0.129  | 0.2343 | 0.122          | 0.01                          | -0.1532 | 0.1382 | 0.2044 | 0.278          |
|         | M12   | LM    | -0.4677      | 0.0283  | -      | 0.27                          | -0.0453 | 0.0799 | 0.0905 | 0.535          | 0.304                         | -0.0236 | 0.0778 | 0.0798 | 0.631          |
|         |       | QM    | -0.0663      | -0.0063 | 0.0007 | 0.284                         | -0.0699 | 0.0794 | 0.1046 | 0.343          | 0.321                         | -0.0469 | 0.0768 | 0.0887 | 0.524          |
|         | M24   | LM    | -0.4677      | 0.0283  | -      | 0.753                         | -0.0458 | 0.0291 | 0.054  | 0.483          | 0.755                         | -0.0256 | 0.0326 | 0.041  | 0.621          |
|         |       | QM    | -0.0663      | -0.0063 | 0.0007 | 0.761                         | -0.0692 | 0.028  | 0.0744 | 0.222          | 0.759                         | -0.0481 | 0.0316 | 0.0572 | 0.452          |
|         | M48   | LM    | -0.4677      | 0.0283  | -      | 0.789                         | -0.0232 | 0.0332 | 0.04   | 0.707          | 0.792                         | 0.0018  | 0.0396 | 0.0389 | 0.711          |
|         |       | QM    | -0.0663      | -0.0063 | 0.0007 | 0.79                          | -0.045  | 0.0328 | 0.0553 | 0.575          | 0.79                          | -0.0171 | 0.0412 | 0.0439 | 0.681          |
| C       | OFH   | LM    | -0.4677      | 0.0283  | -      | 0.005                         | -0.2951 | 0.0979 | 0.3103 | -0.502         | 0.001                         | -0.2758 | 0.1044 | 0.2942 | -0.467         |
|         |       | QM    | -0.0663      | -0.0063 | 0.0007 | 0.006                         | -0.3189 | 0.0965 | 0.3326 | -0.539         | 0.002                         | -0.2982 | 0.1038 | 0.3151 | -0.507         |
|         | M12   | LM    | -0.4677      | 0.0283  | -      | 0.674                         | -0.0811 | 0.0247 | 0.0847 | -0.25          | 0.658                         | -0.0657 | 0.029  | 0.0716 | -0.075         |
|         |       | QM    | -0.0663      | -0.0063 | 0.0007 | 0.67                          | -0.1042 | 0.0232 | 0.1066 | -0.417         | 0.65                          | -0.0891 | 0.0272 | 0.0931 | -0.318         |
|         | M24   | LM    | -0.4677      | 0.0283  | -      | 0.633                         | -0.0689 | 0.0525 | 0.086  | 0.172          | 0.616                         | -0.0494 | 0.0646 | 0.0803 | 0.19           |
|         |       | QM    | -0.0663      | -0.0063 | 0.0007 | 0.593                         | -0.088  | 0.0509 | 0.1012 | -0.009         | 0.569                         | -0.0673 | 0.0659 | 0.0932 | 0.059          |
|         | M48   | LM    | -0.4677      | 0.0283  | -      | 0.793                         | -0.0741 | 0.059  | 0.094  | 0.401          | 0.79                          | -0.0503 | 0.0744 | 0.0885 | 0.437          |
|         |       | QM    | -0.0663      | -0.0063 | 0.0007 | 0.798                         | -0.0886 | 0.0531 | 0.1028 | 0.308          | 0.788                         | -0.0618 | 0.0731 | 0.0946 | 0.384          |

**Table S2.** Coefficients and predictive quality of standard calibration functions for all profiles and depths of the RAV site

| Profile | Layer | Model | Coefficients |         |        | Without temp correction       |         |        |        |                | With temp correction          |          |        |        |                |
|---------|-------|-------|--------------|---------|--------|-------------------------------|---------|--------|--------|----------------|-------------------------------|----------|--------|--------|----------------|
|         |       |       | C0           | C1      | C2     | R <sup>2</sup> <sub>adj</sub> | MPE     | SDPE   | RMSPE  | d <sub>r</sub> | R <sup>2</sup> <sub>adj</sub> | MPE      | SDPE   | RMSPE  | d <sub>r</sub> |
| A       | M01   | LM    | -0.4677      | 0.0283  | -      | 0.012                         | -0.0912 | 0.0712 | 0.1148 | -0.025         | 0.009                         | -0.0799  | 0.074  | 0.1079 | 0.058          |
|         |       | QM    | -0.0663      | -0.0063 | 0.0007 | 0.011                         | -0.1093 | 0.0686 | 0.1283 | -0.162         | 0.008                         | -0.0993  | 0.0711 | 0.1214 | -0.105         |
|         | M12   | LM    | -0.4677      | 0.0283  | -      | 0.441                         | 0.0031  | 0.0451 | 0.0443 | 0.633          | 0.47                          | 0.0177   | 0.0451 | 0.0476 | 0.585          |
|         |       | QM    | -0.0663      | -0.0063 | 0.0007 | 0.43                          | -0.0187 | 0.0445 | 0.0475 | 0.614          | 0.463                         | -0.0047  | 0.0439 | 0.0433 | 0.651          |
|         | M24   | LM    | -0.4677      | 0.0283  | -      | 0.527                         | -0.0623 | 0.0352 | 0.0712 | 0.139          | 0.527                         | -0.0529  | 0.0359 | 0.0635 | 0.253          |
|         |       | QM    | -0.0663      | -0.0063 | 0.0007 | 0.528                         | -0.0739 | 0.0346 | 0.0813 | -0.015         | 0.525                         | -0.0662  | 0.0345 | 0.0744 | 0.091          |
|         | M48   | LM    | -0.4677      | 0.0283  | -      | 0.713                         | -0.0129 | 0.0119 | 0.0174 | 0.598          | 0.718                         | -0.0048  | 0.0119 | 0.0126 | 0.720          |
|         |       | QM    | -0.0663      | -0.0063 | 0.0007 | 0.707                         | -0.0183 | 0.0128 | 0.0222 | 0.454          | 0.712                         | -0.0123  | 0.0123 | 0.0172 | 0.598          |
| B       | M01   | LM    | -0.4677      | 0.0283  | -      | 0.418                         | -0.1484 | 0.0615 | 0.1601 | -0.146         | 0.4                           | -0.1372  | 0.0638 | 0.1507 | -0.076         |
|         |       | QM    | -0.0663      | -0.0063 | 0.0007 | 0.412                         | -0.1615 | 0.0612 | 0.1722 | -0.215         | 0.391                         | -0.1517  | 0.0625 | 0.1636 | -0.164         |
|         | M12   | LM    | -0.4677      | 0.0283  | -      | 0.126                         | -0.0123 | 0.0739 | 0.0734 | 0.474          | 0.125                         | 0.0051   | 0.0787 | 0.0772 | 0.422          |
|         |       | QM    | -0.0663      | -0.0063 | 0.0007 | 0.138                         | -0.0337 | 0.069  | 0.0755 | 0.478          | 0.137                         | -0.0164  | 0.0738 | 0.0741 | 0.470          |
|         | M24   | LM    | -0.4677      | 0.0283  | -      | 0.18                          | -0.0759 | 0.0576 | 0.0946 | 0.197          | 0.16                          | -0.0645  | 0.0603 | 0.0875 | 0.273          |
|         |       | QM    | -0.0663      | -0.0063 | 0.0007 | 0.184                         | -0.094  | 0.0553 | 0.1085 | 0.049          | 0.162                         | -0.0838  | 0.0575 | 0.101  | 0.137          |
|         | M48   | LM    | -0.4677      | 0.0283  | -      | 0.693                         | -0.0207 | 0.0153 | 0.0256 | 0.504          | 0.667                         | -0.0126  | 0.016  | 0.0201 | 0.630          |
|         |       | QM    | -0.0663      | -0.0063 | 0.0007 | 0.697                         | -0.0259 | 0.0168 | 0.0306 | 0.419          | 0.67                          | -0.0198  | 0.0167 | 0.0257 | 0.538          |
| C       | M01   | LM    | -0.4677      | 0.0283  | -      | 0.256                         | 0.0054  | 0.0791 | 0.0777 | 0.491          | 0.271                         | 0.0319   | 0.0861 | 0.0902 | 0.419          |
|         |       | QM    | -0.0663      | -0.0063 | 0.0007 | 0.262                         | -0.0152 | 0.0792 | 0.0791 | 0.476          | 0.276                         | 0.015    | 0.0898 | 0.0893 | 0.419          |
|         | M12   | LM    | -0.4677      | 0.0283  | -      | 0.606                         | 0.0131  | 0.0474 | 0.0483 | 0.675          | 0.601                         | 0.0334   | 0.0477 | 0.0574 | 0.633          |
|         |       | QM    | -0.0663      | -0.0063 | 0.0007 | 0.629                         | -0.0106 | 0.0467 | 0.047  | 0.681          | 0.623                         | 0.0107   | 0.0462 | 0.0465 | 0.677          |
|         | M24   | LM    | -0.4677      | 0.0283  | -      | 0.613                         | -0.0147 | 0.0387 | 0.0407 | 0.691          | 0.591                         | 5.00E-04 | 0.0403 | 0.0395 | 0.701          |
|         |       | QM    | -0.0663      | -0.0063 | 0.0007 | 0.605                         | -0.0371 | 0.0397 | 0.0537 | 0.552          | 0.58                          | -0.0224  | 0.0404 | 0.0454 | 0.647          |
|         | M48   | LM    | -0.4677      | 0.0283  | -      | 0.742                         | -0.0523 | 0.0244 | 0.0576 | 0.245          | 0.746                         | -0.0428  | 0.0254 | 0.0495 | 0.357          |
|         |       | QM    | -0.0663      | -0.0063 | 0.0007 | 0.701                         | -0.0643 | 0.0254 | 0.069  | 0.099          | 0.706                         | -0.0564  | 0.0258 | 0.0618 | 0.190          |

**Table S3.** Coefficients and predictive quality of standard calibration functions for all profiles and depths of the BRA site

| Profile | Layer | Model | Coefficients |         |        | Without temp correction       |         |        |        |                | With temp correction          |         |        |        |                |
|---------|-------|-------|--------------|---------|--------|-------------------------------|---------|--------|--------|----------------|-------------------------------|---------|--------|--------|----------------|
|         |       |       | C0           | C1      | C2     | R <sup>2</sup> <sub>adj</sub> | MPE     | SDPE   | RMSPE  | d <sub>r</sub> | R <sup>2</sup> <sub>adj</sub> | MPE     | SDPE   | RMSPE  | d <sub>r</sub> |
| A       | M01   | LM    | -0.4677      | 0.0283  | -      | 0.572                         | -0.0288 | 0.0542 | 0.0604 | 0.652          | 0.56                          | -0.0149 | 0.0552 | 0.0561 | 0.686          |
|         |       | QM    | -0.0663      | -0.0063 | 0.0007 | 0.568                         | -0.0481 | 0.0556 | 0.0727 | 0.568          | 0.546                         | -0.0348 | 0.0558 | 0.0648 | 0.620          |
|         | M12   | LM    | -0.4677      | 0.0283  | -      | 0.569                         | -0.0854 | 0.0432 | 0.0953 | 0.166          | 0.564                         | -0.0766 | 0.0431 | 0.0875 | 0.242          |
|         |       | QM    | -0.0663      | -0.0063 | 0.0007 | 0.563                         | -0.0945 | 0.0463 | 0.1049 | 0.090          | 0.556                         | -0.0875 | 0.0456 | 0.0983 | 0.151          |
|         | M24   | LM    | -0.4677      | 0.0283  | -      | 0.578                         | -0.0588 | 0.0367 | 0.0689 | 0.258          | 0.578                         | -0.0506 | 0.0361 | 0.0617 | 0.350          |
|         |       | QM    | -0.0663      | -0.0063 | 0.0007 | 0.589                         | -0.0688 | 0.0396 | 0.079  | 0.144          | 0.589                         | -0.0623 | 0.0387 | 0.073  | 0.218          |
|         | M48   | LM    | -0.4677      | 0.0283  | -      | 0.694                         | 0.0600  | 0.0267 | 0.0655 | 0.219          | 0.676                         | 0.0775  | 0.0287 | 0.0824 | -0.009         |
|         |       | QM    | -0.0663      | -0.0063 | 0.0007 | 0.708                         | 0.0356  | 0.0261 | 0.0438 | 0.508          | 0.69                          | 0.0533  | 0.0279 | 0.0598 | 0.296          |
| B       | M01   | LM    | -0.4677      | 0.0283  | -      | 0.45                          | -0.0487 | 0.0531 | 0.0713 | 0.542          | 0.425                         | -0.0366 | 0.0552 | 0.0653 | 0.595          |
|         |       | QM    | -0.0663      | -0.0063 | 0.0007 | 0.437                         | -0.0671 | 0.0537 | 0.0853 | 0.418          | 0.409                         | -0.056  | 0.055  | 0.0777 | 0.501          |
|         | M12   | LM    | -0.4677      | 0.0283  | -      | 0.577                         | -0.079  | 0.0393 | 0.0879 | 0.193          | 0.568                         | -0.0703 | 0.0395 | 0.0802 | 0.272          |
|         |       | QM    | -0.0663      | -0.0063 | 0.0007 | 0.569                         | -0.0884 | 0.0423 | 0.0976 | 0.111          | 0.558                         | -0.0814 | 0.0417 | 0.0911 | 0.173          |
|         | M24   | LM    | -0.4677      | 0.0283  | -      | 0.634                         | -0.0511 | 0.0298 | 0.0589 | 0.329          | 0.626                         | -0.0424 | 0.03   | 0.0515 | 0.426          |
|         |       | QM    | -0.0663      | -0.0063 | 0.0007 | 0.627                         | -0.0634 | 0.0319 | 0.0707 | 0.174          | 0.619                         | -0.0563 | 0.0314 | 0.0641 | 0.267          |
|         | M48   | LM    | -0.4677      | 0.0283  | -      | 0.605                         | -0.029  | 0.0324 | 0.043  | 0.519          | 0.621                         | -0.0148 | 0.0339 | 0.0364 | 0.604          |
|         |       | QM    | -0.0663      | -0.0063 | 0.0007 | 0.589                         | -0.051  | 0.032  | 0.0598 | 0.297          | 0.604                         | -0.0373 | 0.0332 | 0.0495 | 0.428          |
| C       | M01   | LM    | -0.4677      | 0.0283  | -      | 0.468                         | -0.0911 | 0.0522 | 0.1044 | 0.204          | 0.454                         | -0.0811 | 0.0529 | 0.0962 | 0.277          |
|         |       | QM    | -0.0663      | -0.0063 | 0.0007 | 0.479                         | -0.1054 | 0.0531 | 0.1175 | 0.093          | 0.461                         | -0.0968 | 0.053  | 0.1099 | 0.159          |
|         | M12   | LM    | -0.4677      | 0.0283  | -      | 0.448                         | -0.0019 | 0.052  | 0.051  | 0.627          | 0.49                          | 0.0139  | 0.0499 | 0.0508 | 0.582          |
|         |       | QM    | -0.0663      | -0.0063 | 0.0007 | 0.467                         | -0.0254 | 0.0518 | 0.0568 | 0.614          | 0.514                         | -0.0099 | 0.0489 | 0.0489 | 0.656          |
|         | M24   | LM    | -0.4677      | 0.0283  | -      | 0.536                         | -0.0937 | 0.0504 | 0.1059 | 0.044          | 0.564                         | -0.0854 | 0.0488 | 0.0978 | 0.129          |
|         |       | QM    | -0.0663      | -0.0063 | 0.0007 | 0.535                         | -0.1042 | 0.054  | 0.1169 | -0.06          | 0.565                         | -0.0976 | 0.0524 | 0.1103 | 0.004          |
|         | M48   | LM    | -0.4677      | 0.0283  | -      | 0.528                         | -0.0497 | 0.0381 | 0.0622 | 0.380          | 0.523                         | -0.0381 | 0.0398 | 0.0546 | 0.476          |
|         |       | QM    | -0.0663      | -0.0063 | 0.0007 | 0.514                         | -0.0681 | 0.0372 | 0.0772 | 0.183          | 0.51                          | -0.0576 | 0.0382 | 0.0687 | 0.300          |



**Table S4.** Coefficients and predictive quality of standard calibration functions for all profiles and depths of the GON site

| Profile | Layer | Model | Coefficients |         |        | Without temp correction       |         |        |        |                | With temp correction          |         |        |        |                |
|---------|-------|-------|--------------|---------|--------|-------------------------------|---------|--------|--------|----------------|-------------------------------|---------|--------|--------|----------------|
|         |       |       | C0           | C1      | C2     | R <sup>2</sup> <sub>adj</sub> | MPE     | SDPE   | RMSPE  | d <sub>r</sub> | R <sup>2</sup> <sub>adj</sub> | MPE     | SDPE   | RMSPE  | d <sub>r</sub> |
| A       | M01   | LM    | -0.4677      | 0.0283  | -      | 0.516                         | -0.1633 | 0.0733 | 0.1784 | -0.077         | 0.408                         | -0.1271 | 0.0765 | 0.1475 | 0.157          |
|         |       | QM    | -0.0663      | -0.0063 | 0.0007 | 0.514                         | -0.1825 | 0.0721 | 0.1957 | -0.174         | 0.394                         | -0.1389 | 0.0778 | 0.1584 | 0.079          |
|         | M12   | LM    | -0.4677      | 0.0283  | -      | 0.658                         | -0.0867 | 0.0509 | 0.1    | 0.336          | 0.656                         | -0.0569 | 0.0504 | 0.0753 | 0.548          |
|         |       | QM    | -0.0663      | -0.0063 | 0.0007 | 0.667                         | -0.1085 | 0.05   | 0.1191 | 0.169          | 0.663                         | -0.0742 | 0.0507 | 0.0893 | 0.426          |
|         | M24   | LM    | -0.4677      | 0.0283  | -      | 0.8                           | -0.0746 | 0.0423 | 0.0853 | 0.528          | 0.803                         | -0.0495 | 0.0459 | 0.0669 | 0.656          |
|         |       | QM    | -0.0663      | -0.0063 | 0.0007 | 0.801                         | -0.0943 | 0.0419 | 0.1028 | 0.403          | 0.805                         | -0.0663 | 0.0455 | 0.0799 | 0.565          |
|         | M48   | LM    | -0.4677      | 0.0283  | -      | 0.196                         | 0.1545  | 0.0916 | 0.1787 | -0.119         | 0.239                         | 0.2842  | 0.1298 | 0.3114 | -0.514         |
|         |       | QM    | -0.0663      | -0.0063 | 0.0007 | 0.196                         | 0.2263  | 0.1211 | 0.2555 | -0.394         | 0.244                         | 0.4565  | 0.2285 | 0.5085 | -0.698         |
| B       | OFH   | LM    | -0.4677      | 0.0283  | -      | 0.585                         | -0.1928 | 0.0588 | 0.2012 | -0.29          | 0.524                         | -0.1169 | 0.0623 | 0.1319 | 0.129          |
|         |       | QM    | -0.0663      | -0.0063 | 0.0007 | 0.587                         | -0.177  | 0.0563 | 0.1854 | -0.227         | 0.514                         | -0.0647 | 0.0801 | 0.1017 | 0.382          |
|         | M12   | LM    | -0.4677      | 0.0283  | -      | 0.468                         | -0.124  | 0.0631 | 0.1385 | 0.049          | 0.509                         | -0.0817 | 0.0603 | 0.1008 | 0.353          |
|         |       | QM    | -0.0663      | -0.0063 | 0.0007 | 0.457                         | -0.1391 | 0.0631 | 0.1522 | -0.063         | 0.491                         | -0.0861 | 0.0647 | 0.1069 | 0.312          |
|         | M24   | LM    | -0.4677      | 0.0283  | -      | 0.436                         | 0.0812  | 0.0636 | 0.1024 | 0.3            | 0.456                         | 0.1941  | 0.062  | 0.2033 | -0.359         |
|         |       | QM    | -0.0663      | -0.0063 | 0.0007 | 0.44                          | 0.1394  | 0.061  | 0.1517 | -0.125         | 0.456                         | 0.3272  | 0.0879 | 0.3383 | -0.62          |
|         | M48   | LM    | -0.4677      | 0.0283  | -      | 0.057                         | 0.1575  | 0.0723 | 0.1726 | -0.338         | 0.055                         | 0.3460  | 0.1132 | 0.3632 | -0.695         |
|         |       | QM    | -0.0663      | -0.0063 | 0.0007 | 0.054                         | 0.3054  | 0.0957 | 0.3193 | -0.654         | 0.053                         | 0.6787  | 0.2164 | 0.7109 | -0.844         |
| C       | OFH   | LM    | -0.4677      | 0.0283  | -      | 0.092                         | -0.1137 | 0.0851 | 0.141  | 0.099          | 0.019                         | -0.051  | 0.1074 | 0.1169 | 0.212          |
|         |       | QM    | -0.0663      | -0.0063 | 0.0007 | 0.094                         | -0.1117 | 0.0903 | 0.1425 | 0.074          | 0.017                         | -0.0238 | 0.1301 | 0.1297 | 0.128          |
|         | M12   | LM    | -0.4677      | 0.0283  | -      | 0.124                         | -0.0482 | 0.0766 | 0.0892 | 0.431          | 0.05                          | 0.0028  | 0.0848 | 0.0831 | 0.464          |
|         |       | QM    | -0.0663      | -0.0063 | 0.0007 | 0.121                         | -0.0565 | 0.0771 | 0.0944 | 0.395          | 0.045                         | 0.0104  | 0.0915 | 0.0902 | 0.417          |
|         | M24   | LM    | -0.4677      | 0.0283  | -      | 0.266                         | 0.0848  | 0.0479 | 0.097  | -0.061         | 0.098                         | 0.1666  | 0.0614 | 0.1771 | -0.522         |
|         |       | QM    | -0.0663      | -0.0063 | 0.0007 | 0.269                         | 0.107   | 0.048  | 0.1169 | -0.256         | 0.095                         | 0.2295  | 0.0771 | 0.2416 | -0.653         |
|         | M48   | LM    | -0.4677      | 0.0283  | -      | 0.003                         | 0.2503  | 0.1056 | 0.2708 | -0.294         | 0.002                         | 0.4260  | 0.14   | 0.4474 | -0.585         |
|         |       | QM    | -0.0663      | -0.0063 | 0.0007 | 0.002                         | 0.3816  | 0.1139 | 0.3975 | -0.537         | 0.003                         | 0.7202  | 0.2147 | 0.7502 | -0.755         |

**Table S5.** Coefficients and predictive quality of standard calibration functions for all profiles and depths of the HOE site

| Profile | Layer | Model | Coefficients |         |        | Without temp correction       |         |        |        |                | With temp correction          |         |        |        |                |
|---------|-------|-------|--------------|---------|--------|-------------------------------|---------|--------|--------|----------------|-------------------------------|---------|--------|--------|----------------|
|         |       |       | C0           | C1      | C2     | R <sup>2</sup> <sub>adj</sub> | MPE     | SDPE   | RMSPE  | d <sub>r</sub> | R <sup>2</sup> <sub>adj</sub> | MPE     | SDPE   | RMSPE  | d <sub>r</sub> |
| A       | M01   | LM    | -0.4677      | 0.0283  | -      | 0.576                         | -0.0989 | 0.0452 | 0.1084 | 0.099          | 0.544                         | -0.0453 | 0.0548 | 0.0703 | 0.455          |
|         |       | QM    | -0.0663      | -0.0063 | 0.0007 | 0.58                          | -0.1082 | 0.0466 | 0.1174 | 0.015          | 0.543                         | -0.0373 | 0.0685 | 0.0768 | 0.418          |
|         | M12   | LM    | -0.4677      | 0.0283  | -      | 0.903                         | -0.0646 | 0.0227 | 0.0683 | 0.454          | 0.868                         | -0.0243 | 0.0303 | 0.0384 | 0.732          |
|         |       | QM    | -0.0663      | -0.0063 | 0.0007 | 0.897                         | -0.0827 | 0.0227 | 0.0856 | 0.302          | 0.854                         | -0.0333 | 0.0399 | 0.0514 | 0.644          |
|         | M24   | LM    | -0.4677      | 0.0283  | -      | 0.687                         | 0.0006  | 0.0411 | 0.0403 | 0.621          | 0.73                          | 0.0451  | 0.0315 | 0.0547 | 0.428          |
|         |       | QM    | -0.0663      | -0.0063 | 0.0007 | 0.687                         | -0.015  | 0.0392 | 0.0413 | 0.628          | 0.729                         | 0.0403  | 0.0286 | 0.0491 | 0.486          |
|         | M48   | LM    | -0.4677      | 0.0283  | -      | 0.703                         | 0.0101  | 0.0302 | 0.0313 | 0.665          | 0.705                         | 0.061   | 0.0235 | 0.0652 | 0.108          |
|         |       | QM    | -0.0663      | -0.0063 | 0.0007 | 0.703                         | -0.0017 | 0.0281 | 0.0276 | 0.675          | 0.703                         | 0.0635  | 0.0238 | 0.0676 | 0.072          |
| B       | M01   | LM    | -0.4677      | 0.0283  | -      | 0.814                         | -0.1136 | 0.0347 | 0.1186 | 0.024          | 0.797                         | -0.0763 | 0.05   | 0.0907 | 0.345          |
|         |       | QM    | -0.0663      | -0.0063 | 0.0007 | 0.801                         | -0.1318 | 0.0383 | 0.137  | -0.117         | 0.778                         | -0.0864 | 0.0617 | 0.1055 | 0.247          |
|         | M12   | LM    | -0.4677      | 0.0283  | -      | 0.955                         | -0.0534 | 0.0201 | 0.0569 | 0.673          | 0.942                         | -0.0159 | 0.0282 | 0.0319 | 0.853          |
|         |       | QM    | -0.0663      | -0.0063 | 0.0007 | 0.951                         | -0.0713 | 0.0204 | 0.0741 | 0.564          | 0.931                         | -0.0256 | 0.0381 | 0.0453 | 0.78           |
|         | M24   | LM    | -0.4677      | 0.0283  | -      | 0.771                         | 0.0022  | 0.0395 | 0.0388 | 0.698          | 0.797                         | 0.0451  | 0.0303 | 0.054  | 0.531          |
|         |       | QM    | -0.0663      | -0.0063 | 0.0007 | 0.772                         | -0.0149 | 0.0366 | 0.0389 | 0.699          | 0.8                           | 0.038   | 0.0294 | 0.0477 | 0.585          |
|         | M48   | LM    | -0.4677      | 0.0283  | -      | 0.66                          | 0.0404  | 0.0271 | 0.0483 | 0.382          | 0.65                          | 0.0952  | 0.0267 | 0.0987 | -0.307         |
|         |       | QM    | -0.0663      | -0.0063 | 0.0007 | 0.661                         | 0.0313  | 0.0254 | 0.04   | 0.508          | 0.654                         | 0.1031  | 0.0339 | 0.1083 | -0.36          |
| C       | M01   | LM    | -0.4677      | 0.0283  | -      | 0.374                         | -0.1674 | 0.0637 | 0.1787 | -0.372         | 0.351                         | -0.1256 | 0.0792 | 0.1477 | -0.162         |
|         |       | QM    | -0.0663      | -0.0063 | 0.0007 | 0.368                         | -0.1839 | 0.0677 | 0.1955 | -0.428         | 0.341                         | -0.1317 | 0.0918 | 0.1595 | -0.201         |
|         | M12   | LM    | -0.4677      | 0.0283  | -      | 0.865                         | -0.0773 | 0.0264 | 0.0815 | 0.316          | 0.835                         | -0.0358 | 0.042  | 0.0546 | 0.621          |
|         |       | QM    | -0.0663      | -0.0063 | 0.0007 | 0.858                         | -0.0942 | 0.0295 | 0.0985 | 0.166          | 0.821                         | -0.0428 | 0.0543 | 0.0683 | 0.525          |
|         | M24   | LM    | -0.4677      | 0.0283  | -      | 0.67                          | -0.0574 | 0.037  | 0.0679 | 0.425          | 0.63                          | -0.0206 | 0.0455 | 0.0491 | 0.593          |
|         |       | QM    | -0.0663      | -0.0063 | 0.0007 | 0.668                         | -0.0774 | 0.0378 | 0.0858 | 0.228          | 0.624                         | -0.0333 | 0.0517 | 0.0606 | 0.498          |
|         | M48   | LM    | -0.4677      | 0.0283  | -      | 0.749                         | -0.0035 | 0.0253 | 0.025  | 0.733          | 0.703                         | 0.0439  | 0.0248 | 0.0502 | 0.361          |
|         |       | QM    | -0.0663      | -0.0063 | 0.0007 | 0.749                         | -0.0181 | 0.0234 | 0.0292 | 0.676          | 0.702                         | 0.0415  | 0.0296 | 0.0506 | 0.361          |
